# Supplementary material for: Effects of co-coordinated auxiliary ligands on the photoelectrochemical behaviour of titanium-alkoxide-dyes
Source: Royal Society of Chemistry journal article supplement (doi:10.1039/c7ta05639g), 2017-01-01
Supplement: c7ta05639g1.pdf [file c7ta05639g1.pdf]

## Electronic Supplementary Information for

### Effects of co-coordinated auxiliary ligands on photoelectrochemical behaviours of titanium-alkoxide-dyes

Yao Guo, Jin-Le Hou, Wen Luo, Zhao-Qi Li, Dan-Hong Zou, Qin-Yu Zhu,\* and Jie Dai\*

#### Figures

**Fig. S1.** Experimental XRD patterns of **1** (a), **2** (b) and **3** (c) along with the calculated patterns from the crystal data.

**Fig. S2.** Ball-stick plots of compound **2** (a), **3** (b), showing the molecular structure.

**Fig. S3.** The surface morphologies of the nano TiO<sub>2</sub> film (a) and films of **1** (b), **2** (c), **3** (d), showing the smooth and uniform surfaces.

**Fig. S4.** The absorption spectra of **1**, dye Az and Az treated TiO<sub>2</sub> substrate.

**Fig. S5.** Raman spectra of the crystal **1** and **1** treated TiO<sub>2</sub> electrode.

#### Tables

**Table S1** Crystal data and structural refinement parameters for **1–3**.

**Table S2** Results of TD-DFT calculation for **1–3**.

---

## FIGURES

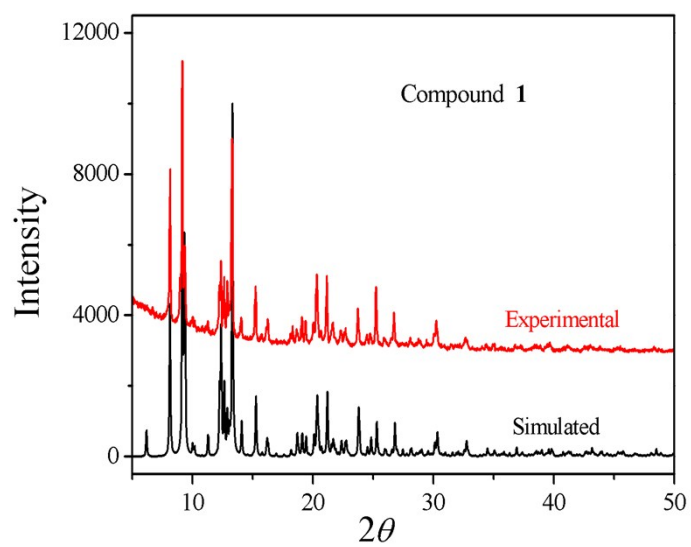

(a)

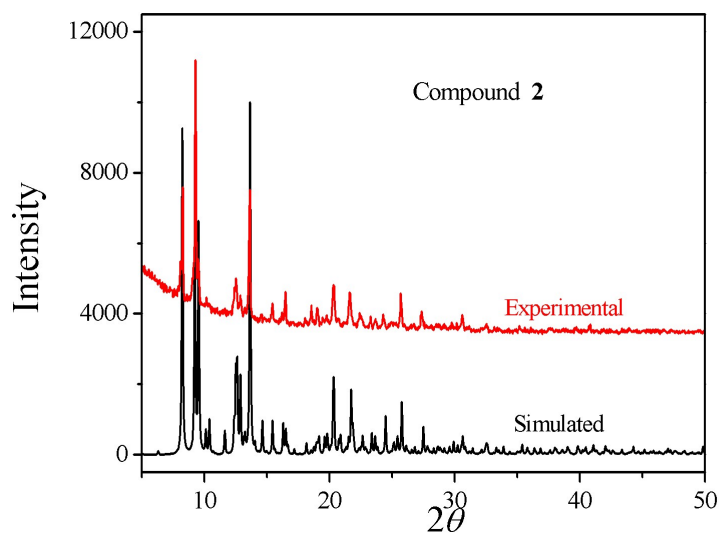

(b)

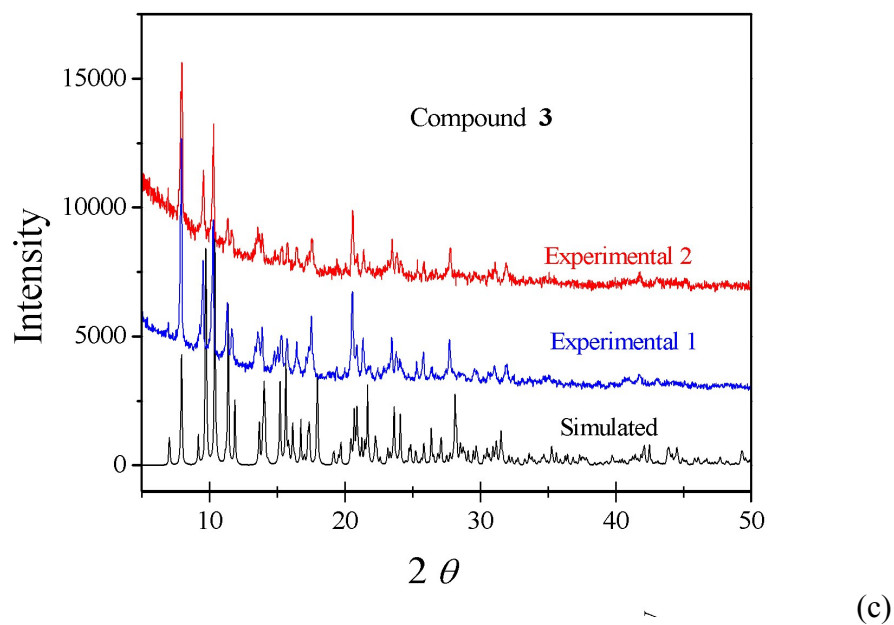

**Fig. S1.** Experimental XRD patterns of **1** (a), **2** (b) and **3** (c) along with the calculated patterns from the crystal data.

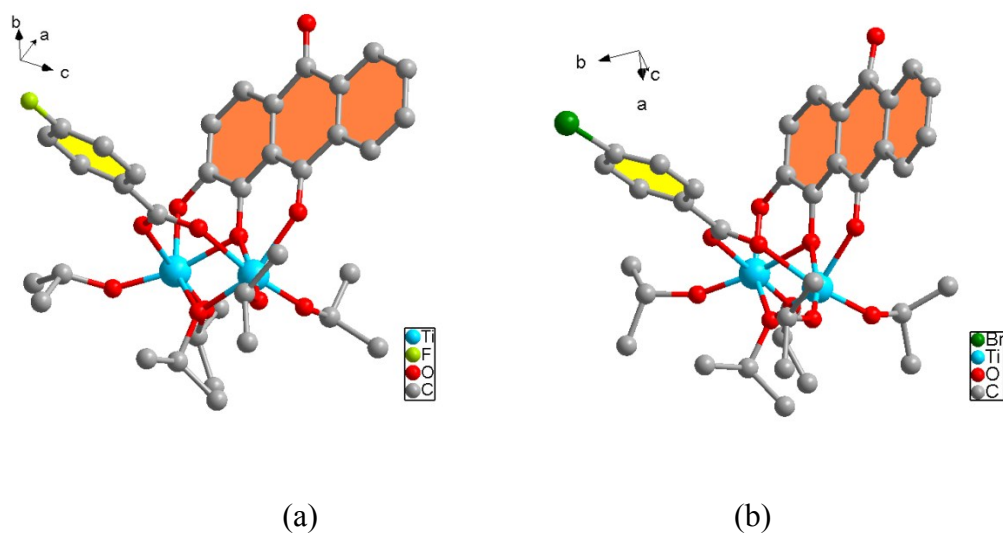

**Fig. S2.** Ball-stick plots of compound **2** (a), **3** (b), showing the molecular structure.

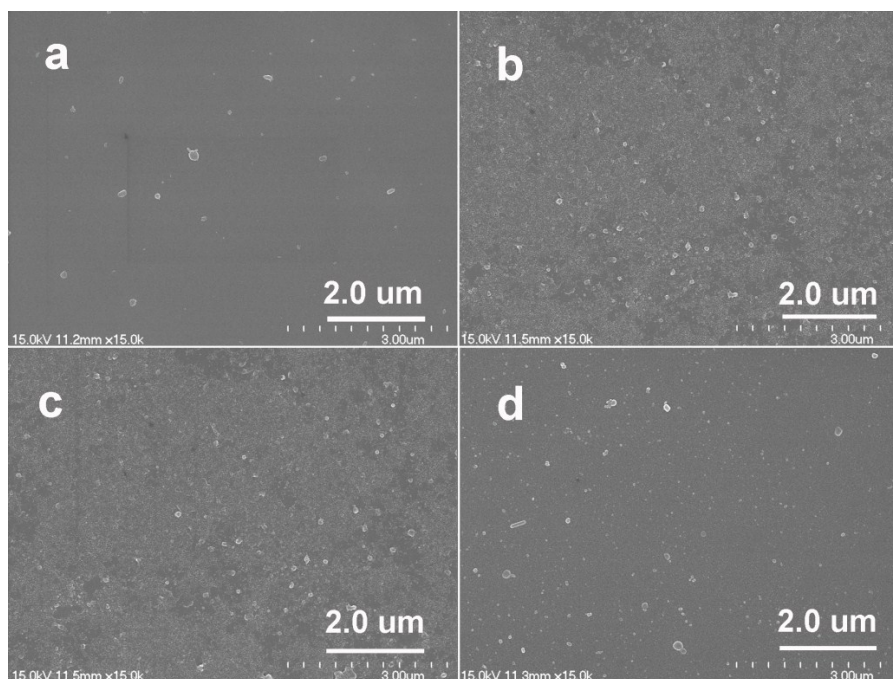

**Fig. S3.** The surface morphologies of the nano TiO<sub>2</sub> film (a) and films of 1 (b), 2 (c), 3 (d), showing the smooth and uniform surfaces.

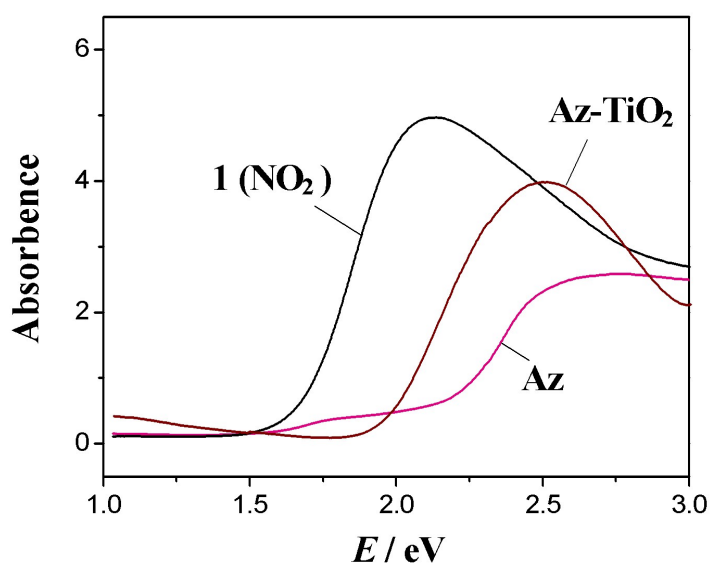

**Fig. S4.** The absorption spectra of **1**, dye Az and Az treated TiO<sub>2</sub> substrate.

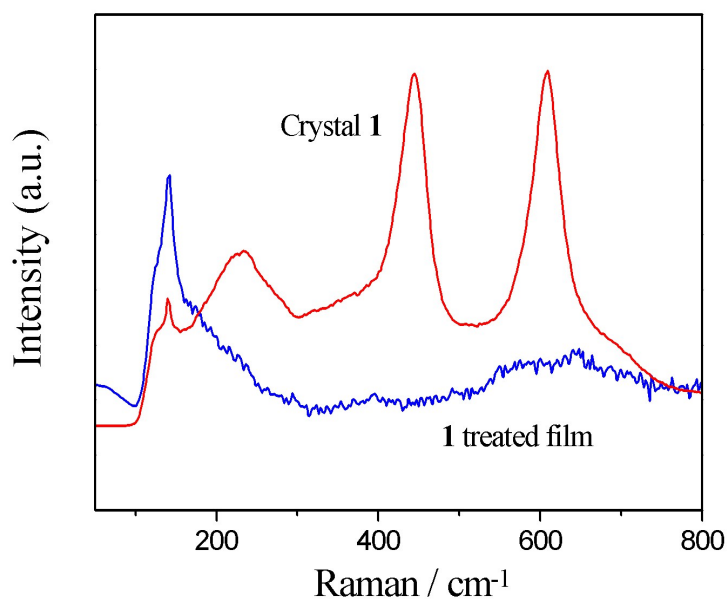

**Fig. S5.** Raman spectra of the crystal **1** and **1** treated TiO<sub>2</sub> electrode.

**T Table S1** Crystal data and structural refinement parameters for **1–3**.

|                                                    | <b>1</b>                                                         | <b>2</b>                                                         | <b>3</b>                                                          |
|----------------------------------------------------|------------------------------------------------------------------|------------------------------------------------------------------|-------------------------------------------------------------------|
| formula                                            | C <sub>36</sub> H <sub>45</sub> NO <sub>13</sub> Ti <sub>2</sub> | C <sub>36</sub> H <sub>45</sub> FO <sub>11</sub> Ti <sub>2</sub> | C <sub>36</sub> H <sub>45</sub> BrO <sub>11</sub> Ti <sub>2</sub> |
| fw                                                 | 795.51                                                           | 768.51                                                           | 829.41                                                            |
| cryst size (mm <sup>3</sup> )                      | 0.35 × 0.20 × 0.10                                               | 0.50 × 0.40 × 0.30                                               | 0.26 × 0.24 × 0.20                                                |
| cryst syst                                         | monoclinic                                                       | monoclinic                                                       | monoclinic                                                        |
| space group                                        | <i>P2<sub>1</sub>/c</i>                                          | <i>P2<sub>1</sub>/c</i>                                          | <i>P2<sub>1</sub>/c</i>                                           |
| <i>a</i> (Å)                                       | 9.6859(3)                                                        | 9.6424(13)                                                       | 12.9644 (12)                                                      |
| <i>b</i> (Å)                                       | 21.7550(6)                                                       | 21.475(3)                                                        | 13.1630(12)                                                       |
| <i>c</i> (Å)                                       | 19.0222(5)                                                       | 18.640(2)                                                        | 23.030(2)                                                         |
| <i>α</i> (deg)                                     | 90.00                                                            | 90.00                                                            | 90.00                                                             |
| <i>β</i> (deg)                                     | 93.686(3)                                                        | 96.6066(4)                                                       | 104.724(3)                                                        |
| <i>γ</i> (deg)                                     | 90.00                                                            | 90.00                                                            | 90.00                                                             |
| <i>V</i> (Å <sup>3</sup> )                         | 4000.0(2)                                                        | 3834.2(9)                                                        | 3801.0(6)                                                         |
| <i>Z</i>                                           | 4                                                                | 4                                                                | 4                                                                 |
| $\rho_{\text{calcd}}$ (g cm <sup>-3</sup> )        | 1.321                                                            | 1.331                                                            | 1.449                                                             |
| <i>F</i> (000)                                     | 1664                                                             | 1608                                                             | 1712                                                              |
| $\mu$ (mm <sup>-1</sup> )                          | 0.460                                                            | 0.477                                                            | 1.528                                                             |
| <i>T</i> (K)                                       | 293(2)                                                           | 293(2)                                                           | 120(2)                                                            |
| reflns collected                                   | 31104                                                            | 20324                                                            | 60996                                                             |
| unique reflns                                      | 10589                                                            | 6748                                                             | 8698                                                              |
| observed reflns                                    | 6508                                                             | 3688                                                             | 5888                                                              |
| no. params                                         | 479                                                              | 468                                                              | 461                                                               |
| GOF on <i>F</i> <sup>2</sup>                       | 1.065                                                            | 1.084                                                            | 1.165                                                             |
| <i>R</i> <sub>1</sub> [ <i>I</i> > 2σ( <i>I</i> )] | 0.0665                                                           | 0.0902                                                           | 0.0543                                                            |
| <i>wR</i> <sub>2</sub>                             | 0.1442                                                           | 0.1731                                                           | 0.1345                                                            |

**Table S2** Results of TD-DFT calculation for compounds for **1, 2 and 3**.

|                 | <b>1</b>                   | <b>2</b>                   | <b>3</b>                   |
|-----------------|----------------------------|----------------------------|----------------------------|
| Gap Energy (eV) | 2.127                      | 2.120                      | 2.112                      |
| Absorption (nm) | 583                        | 585                        | 587                        |
| <i>f</i>        | 0.0996                     | 0.1045                     | 0.1024                     |
| Transition      | 198A → 199A<br>198B → 199B | 204A → 205A<br>204B → 205B | 191A → 192A<br>191B → 192B |
| Coefficient     | 0.69933                    | 0.69924                    | 0.69942                    |
